# Supplementary material
Source: Springer Nature journal article supplement (https://www.springermedizin.de/resource/supplementary/12935_2011_301_MOESM5_ESM.pdf/9540264)

Transcript (copies per 50ng RNA)

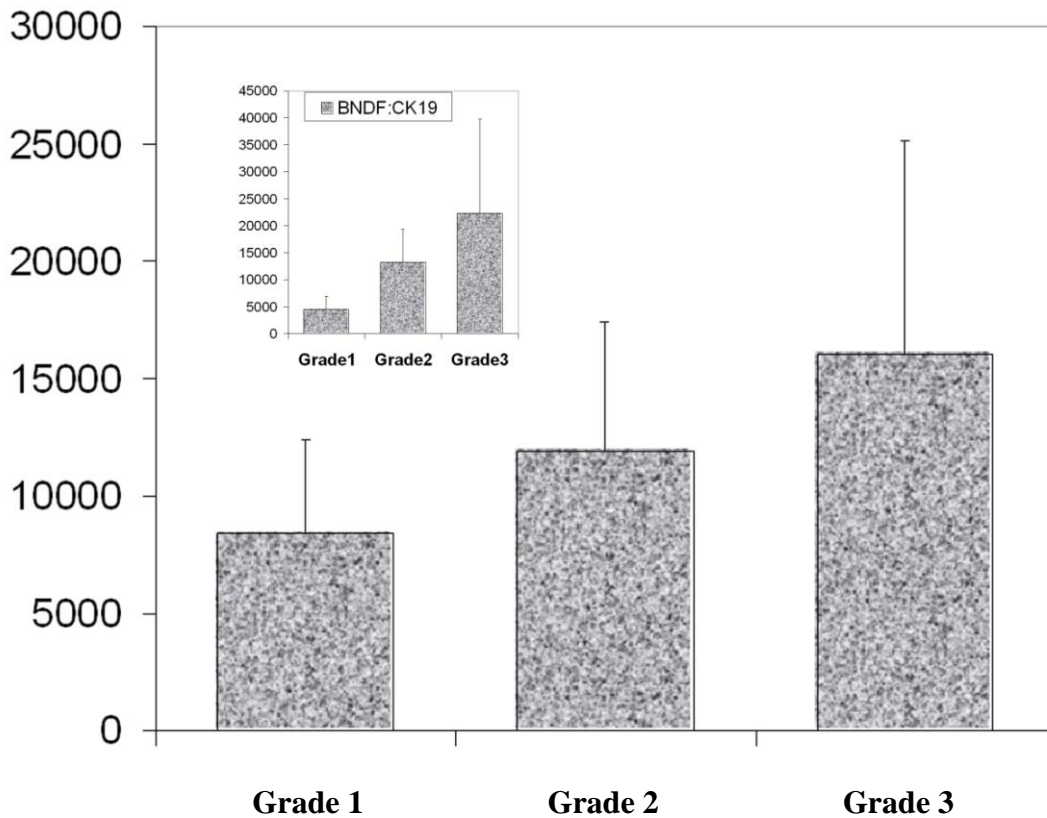

Supplement: MOESM5 [file 9540264]
